# Supplementary material for: Bactofilins form non-polar filaments that bind to membranes directly
Source: bioRxiv or medRxiv preprint supplement (doi:10.1101/617639), 2019-04-24
Supplement: Supplementary file [file media-2.pdf]

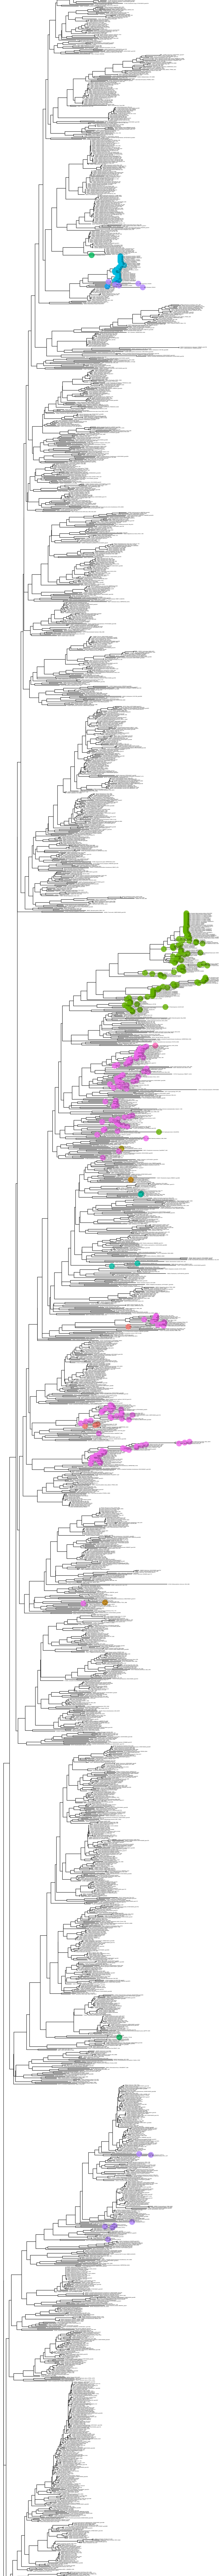

- Archaeoglobi
- Crenarchaeota
- Discosoa
- Fungi
- Metazoa
- Methanomada group
- Oomycetes
- Pelagophyceae
- PX clade
- Stenosarchaea group
- Thaumarchaeota
